# Supplementary material for: Use of Adjuvant Rectal Diazepam with Oral Tadalafil for Treatment of Chronic Prostatitis/Chronic Pelvic Pain Syndrome
Source: Research Square preprint supplement (doi:10.21203/rs.3.rs-2814770/v1), 2023-04-18
Supplement: Supplementary file 1 [file 7ef22e0145757ee1767d1fc0.xlsx]

## Sheet: Sheet1
	All Patients	Tadalafil	Tadalafil + Diazepam	P-Value
	(N=63)	(N=40)	(N=23)
Baseline Pain Score	11 [9, 14]	10 [7.5, 12.5]	12 [10, 15]	0.11
Baseline Urinary Score	5 [2, 7]	4 [2, 7]	5 [1, 8]	0.478
Baseline Quality of Life Score	9 [7, 11]	8.5 [7, 11]	11 [9, 12]	0.0129
Baseline Aggregate Score	24 [18, 30]	22 [16.75, 28]	27 [21, 34]	0.0734
Final Pain Score	6 [2, 9]	6 [0, 8.5]	8 [3, 9]	0.163
Final Urinary Score	2 [1, 5]	2.5 [1.5, 5]	2 [1, 5]	0.623
Final Quality of Life Score	6 [3, 9]	4 [2, 7]	8.5 [4, 11]	0.0185
Final Aggregate Score	14 [8, 20]	12 [8, 18.5]	17 [8, 23]	0.131
