# Supplementary material for: Use of Adjuvant Rectal Diazepam with Oral Tadalafil for Treatment of Chronic Prostatitis/Chronic Pelvic Pain Syndrome
Source: Research Square preprint supplement (doi:10.21203/rs.3.rs-2814770/v1), 2023-04-18
Supplement: Supplementary file 2 [file a973f45bc2023c6fd153f557.xlsx]

## Sheet: Sheet1
	All Patients	Tadalafil	Tadalafil + Diazepam	P-Value
	(N=63)	(N=40)	(N=23)
Age	42 [33, 54]	44 [36.5, 56.5]	41 [29, 53]	0.254
Median Days of Therapy	182 [91, 382]	182 [91, 418.5]	188 [127, 474]	0.467
Race				1
Caucasian	76.2 (48/63)	75 (30/40)	78.3 (18/23)
African American/Black	3.2 (2/63)	2.5 (1/40)	4.3 (1/23)
Asian	9.5 (6/63)	10 (4/40)	8.7 (2/23)
Other	9.5 (6/63)	10 (4/40)	8.7 (2/23)
Declined	1.6 (1/63)	2.5 (1/40)	0 (0/23)
Hypertension	19.1 (12/63)	22.5 (9/40)	13.0 (3/23)	0.51
Diabetes	7.9 (5/63)	12.5 (5/40)	0 (0/23)	0.149
Anxiety	44.4 (28/63)	32.5 (13/40)	65.2 (15/23)	0.018
Depression	25.4 (16/63)	20 (8/40)	34.8 (8/23)	0.236
Lower Back Pain	31.8 (20/63)	37.5 (15/40)	21.7 (5/23)	0.264
Irritable Bowel Syndrome	12.7 (8/63)	12.5 (5/40)	13.0 (3/23)	1
Antibiotics	49.2 (31/63)	45 (18/40)	56.5 (13/23)	0.439
Alpha Antagonists	44.4 (28/63)	50 (20/40)	34.8 (8/23)	0.298
Baclofen	22.2 (14/63)	0 (0/40)	56.5 (13/23)	0
Steroids and/or NSAIDs	22.2 (14/63)	20 (8/40)	26.1 (6/23)	0.575
Pelvic Floor Physical Therapy	77.8 (49/63)	67.5 (27/40)	95.7 (22/23)	0.011
