# Supplementary material for: Use of Adjuvant Rectal Diazepam with Oral Tadalafil for Treatment of Chronic Prostatitis/Chronic Pelvic Pain Syndrome
Source: Research Square preprint supplement (doi:10.21203/rs.3.rs-2814770/v1), 2023-04-18
Supplement: Supplementary file 3 [file d701bbcdc0bf37c307546ae0.xlsx]

## Sheet: Sheet1
Variable	Coefficient β (95% CI)	P-Value
Baseline Pain Score	0.08 (-0.05-0.2)	0.2
Baseline Urinary Score	0.05 (-0.11-0.22)	0.53
Baseline Quality of Life Score	0.2 (-0.01-0.40)	0.06
Baseline Aggregate Score	0.06 (-0.01-0.12)	0.09
Final Pain Score	0.08 (-0.04-0.20)	0.17
Final Urinary Score	-0.03 (-0.23-0.17	0.75
Final Quality of Life Score	0.19 (0.03-0. 34)	0.019
Final Aggregate Score	0.05 (-0.01-0.11)	0.11
